# Supplementary material
Source: PubMed Central journal article supplement (PMC4249231)
Supplement: AEM.02488-14_zam999105868so1.pdf [file AEM.02488-14_zam999105868so1.pdf]

## **Supplemental Materials**

**Title:** Molecular Epidemiology of Cases of *Mycoplasma californicum* Infection in Japan

**Authors:** Eiji Hata,<sup>a\*</sup> Kan-ichiro Suzuki,<sup>a,b</sup> Hideki Hanyu,<sup>a,c</sup> Megumi Itoh,<sup>d</sup> Hidetoshi Higuchi,<sup>e</sup> Hideki Kobayashi<sup>f</sup>

Dairy Hygiene Research Division, National Institute of Animal Health (NIAH), National Agriculture and Food Research Organization (NARO), Sapporo, Hokkaido, Japan<sup>a</sup>; Seibu Livestock Hygiene Service Center, Yoshinogawa, Tokushima, Japan<sup>b</sup>; Abashiri Livestock Hygiene Service Center, Kitami, Hokkaido, Japan<sup>c</sup>; Agriculture Research Department, Animal Research Center Hokkaido Research Organization, Shintoku, Hokkaido, Japan<sup>d</sup>; School of Veterinary Medicine, Rakuno Gakuen University, Ebetsu, Hokkaido, Japan<sup>e</sup>; Center for Animal Disease Control and Prevention, NIAH, NARO, Tsukuba, Ibaraki, Japan<sup>f</sup>

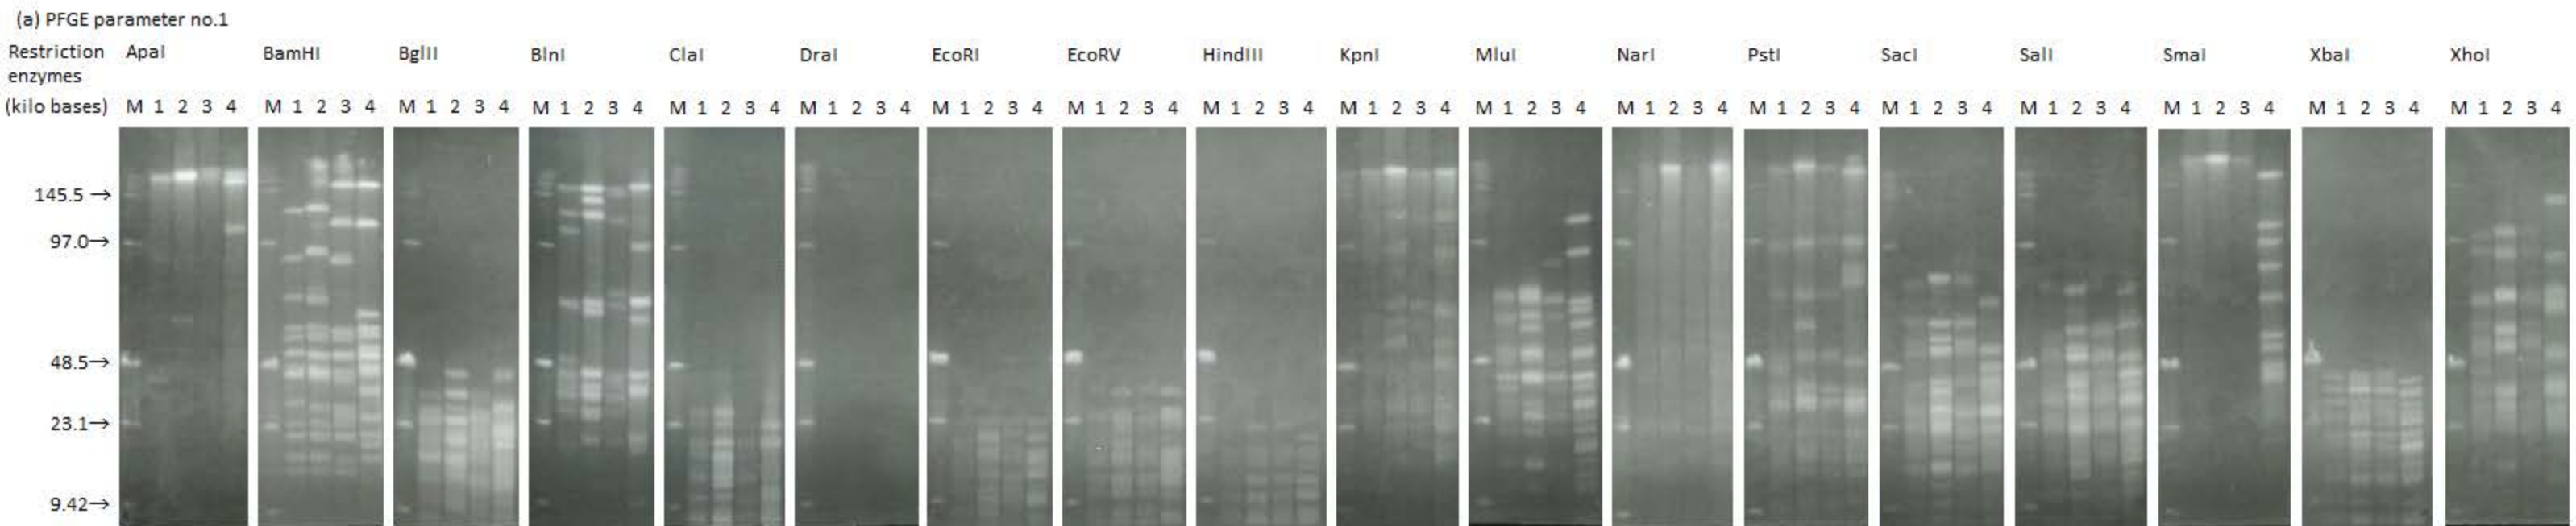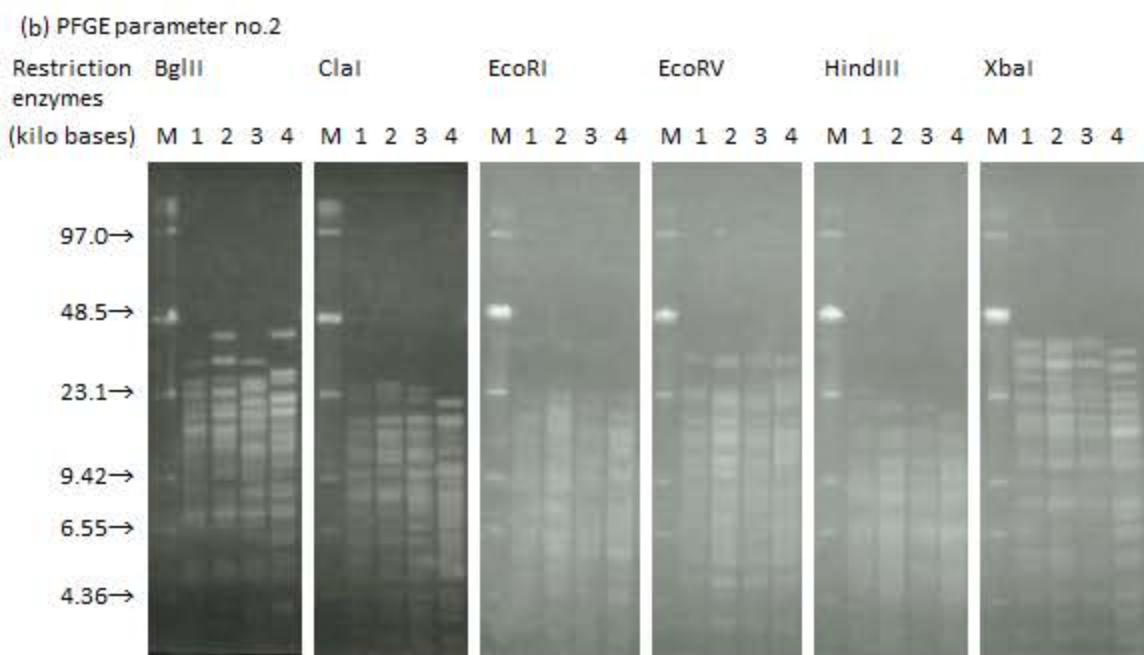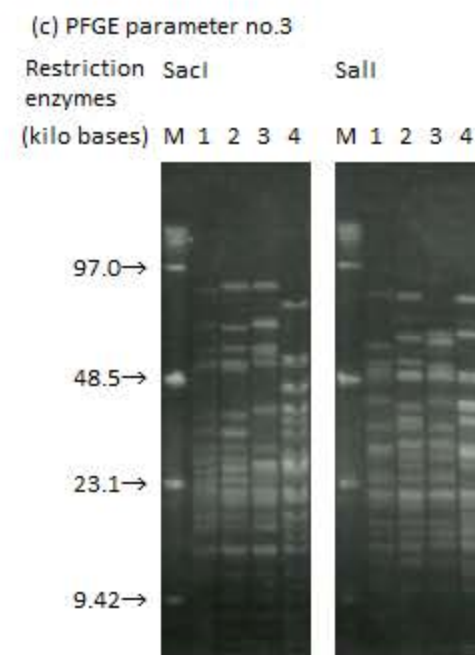

Details of PFGE parameters

| PFGE parameter | voltage (V/cm) | swiching time (sec) | electrophoresis time (h) | buffer temp. (°C) | buffer    | gel concentration (%) |
|----------------|----------------|---------------------|--------------------------|-------------------|-----------|-----------------------|
| 1              | 5.7            | 4-5                 | 23.5                     | 10                | 0.5 x TBE | 1                     |
| 2              | 5.7            | 1-5                 | 17                       | 10                | 0.5 x TBE | 1                     |
| 3              | 5.7            | 1-5                 | 23                       | 10                | 0.5 x TBE | 1                     |

**Figure S1. Pulse patterns of *M. californicum* strains by various restriction enzymes.**

M: Low Range PFG Marker (New England BioLabs®Inc.). Lane 1: *M. californicum* strain HAZ44\_1. Lane 2: *M. californicum* strain HAZ175\_1. Lane 3: *M. californicum* strain HAZ160\_1. Lane 4: *M. californicum* strain ATCC 33461.

**TABLE S1.** Details of *M. californicum* strains used for the *in vivo* stability study.

| Strain name | Case <sup>a</sup> | Farm <sup>a</sup> | Cow name | Year/Month/Day | Pulsotype <sup>a</sup> | MLVA profile <sup>a</sup> |
|-------------|-------------------|-------------------|----------|----------------|------------------------|---------------------------|
| HAZ 112_1   | 10                | H                 | 71       | 2008/Apr/9     | C13                    | 4-9-5-8                   |
| HAZ 125_1   | 10                | H                 | 71       | 2008/Apr/23    | C13                    | 4-9-5-8                   |
| HAZ 113_1   | 10                | H                 | 85       | 2008/Apr/9     | C13                    | 4-9-5-8                   |
| HAZ 126_1   | 10                | H                 | 85       | 2008/Apr/23    | C13                    | 4-9-5-8                   |
| HAZ 124_1   | 10                | H                 | 213      | 2008/Apr/9     | C13                    | 4-9-5-8                   |
| HAZ 131_1   | 10                | H                 | 213      | 2008/Apr/23    | C13                    | 4-9-5-8                   |
| HAZ 118_1   | 10                | H                 | 114      | 2008/Apr/9     | C13                    | 4-9-5-8                   |
| HAZ 118_1   | 10                | H                 | 114      | 2008/Apr/23    | C14                    | 4-9-5-8                   |
| HAZ 26_1    | 6                 | F                 | 1267     | 2007/Aug/13    | A14                    | 6-6-5-9                   |
| HAZ 506     | 6                 | F                 | 1267     | 2007/Sep/7     | A14                    | 6-6-5-9                   |
| HAZ 28_1    | 6                 | F                 | 1457     | 2007/Aug/13    | A8                     | 6-6-5-9                   |
| HAZ 510     | 6                 | F                 | 1457     | 2007/Sep/7     | A6                     | 6-6-5-9                   |
| HAZ 511     | 6                 | F                 | 1457     | 2007/Sep/7     | A14                    | 6-6-5-9                   |
| HAZ 513     | 6                 | F                 | 1457     | 2007/Sep/7     | A11                    | 6-6-5-9                   |

<sup>a</sup>The cases and Farms correspond to those shown in Table 1. The MLVA profiles and pulsotypes correspond to those shown in Fig. 2.

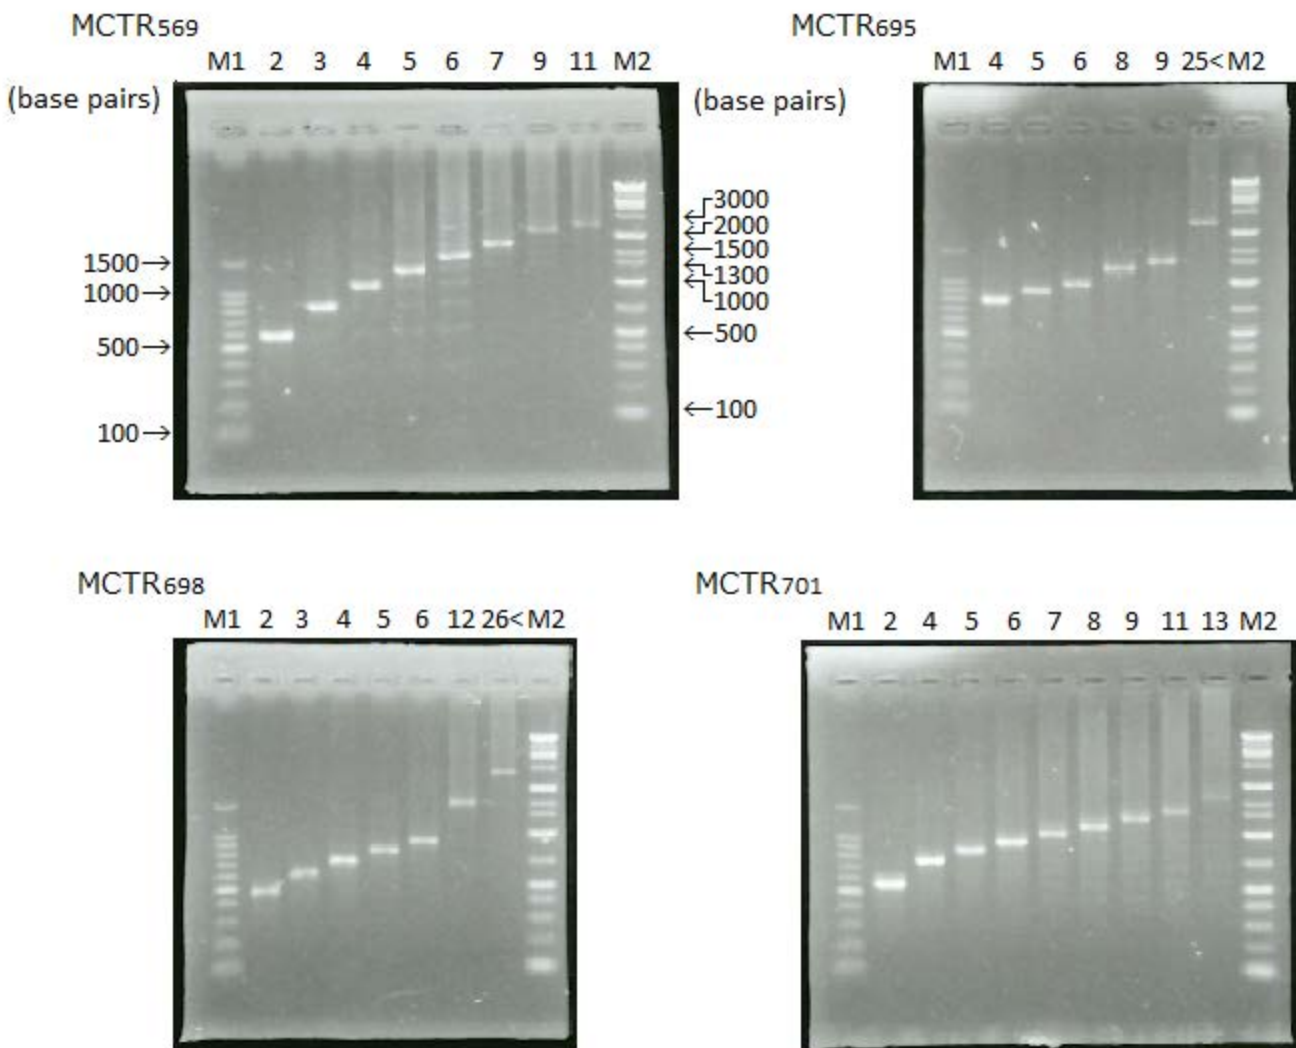

**Figure S2. Agarose gel electrophoresis of VNTR amplicons in the present study (2% [w/v] agarose, 0.5 x TBE buffer).** The numbers above the lanes show the number of repeat units. M1: 100-bp DNA ladder (Toyobo, Osaka, Japan), M2: Gene ladder wide 1 (Wako).
